# Supplementary material for: High enzymatic activity preservation of malate dehydrogenase immobilized in a Langmuir–Blodgett film and its electrochemical biosensor application for malic acid detection
Source: Royal Society of Chemistry journal article supplement (doi:10.1039/c6ra17465e), 2016-01-01
Supplement: c6ra17465e1.pdf [file c6ra17465e1.pdf]

## Electronic Supplementary Information (ESI)

# High Enzymatic Activity Preservation of Malate Dehydrogenase immobilized in Langmuir-Blodgett Film and Its Electrochemical Biosensor Application for Malic Acid Detection

Bahri Gür,<sup>a,b\*</sup> Mesut Işık,<sup>b,c</sup> Kader Dağcı Kıranşan,<sup>b</sup> Murat Alanyalıoğlu,<sup>b</sup> Şükrü Beydemir<sup>b,d</sup>  
and Kadem Meral<sup>b\*</sup>

<sup>a</sup>*Department of Pharmacy Services, Health Services Vocational School, Iğdır University, 76000, Iğdır, Turkey.*

<sup>b</sup>*Department of Chemistry, Faculty of Sciences, Atatürk University, 25240, Erzurum, Turkey.*

<sup>c</sup>*Department of Medical Services and Techniques, Health Services Vocational School, Harran University, 63000, Şanlıurfa, Turkey.*

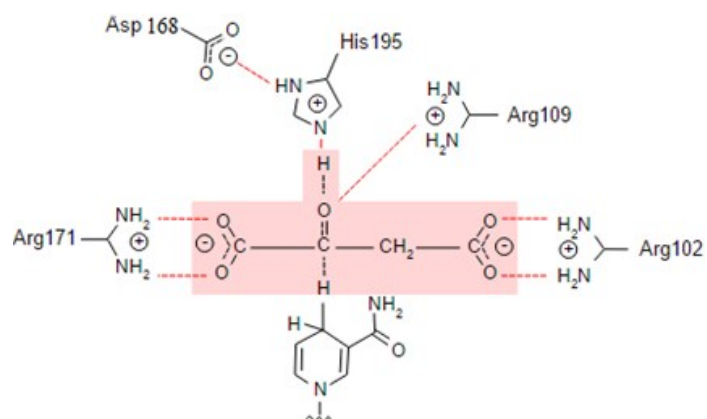

**Figure S1.** Active site of MDH.

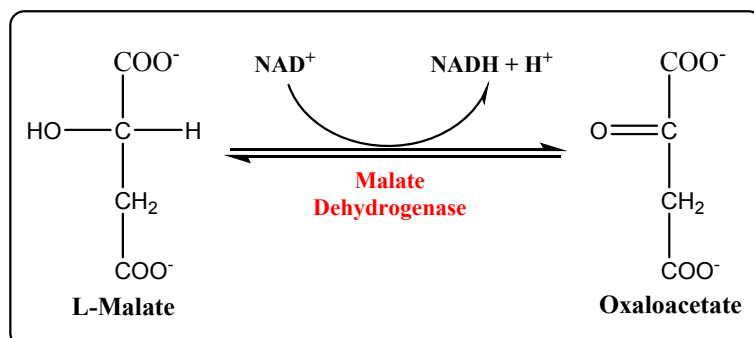

**Figure S2.** Biocatalytic activity of malate dehydrogenase enzyme.

**Table S1.** Comparison of MDH–ODA/ITO electrode with other electrochemical sensors for quantification of MA.

| Electrode                                    | Technique          | pH  | Sensitivity                             | Linear region | Detection limit | Reference |
|----------------------------------------------|--------------------|-----|-----------------------------------------|---------------|-----------------|-----------|
| pH electrode                                 | potentiometry      | 7.4 | -                                       | 0.1-4.0 g/L   | 0.1 g/L         | 40        |
| MDH-SWCNT <sup>[a]</sup> /GCE <sup>[b]</sup> | amperometry        | 9.3 | 0.455 $\mu\text{AmM}^{-1}$              | 0.2-0.8 mM    | 0.033 mM        | 41        |
| Graphite                                     | voltammetry        | 8.0 | -                                       | -             | 0.0004 g/L      | 42        |
| AgA-PE <sup>[c]</sup>                        | DPV <sup>[d]</sup> | 2.0 | 630 $\mu\text{AmM}^{-1}$                | 0.002-0.1 mM  | 0.0005 mM       | 43        |
| MDH–ODA/ITO                                  | voltammetry        | 7.4 | 0.04 $\mu\text{AmM}^{-1}\text{cm}^{-2}$ | 2.2-50.0 mM   | 0.66 mM         | this work |

*[a] single-walled carbon nanotube, [b] glassy carbon electrode, [c] silver amalgam paste electrode [d] differential puls voltammetry*
